# Supplementary material for: Silencing of the Aflatoxin Gene Cluster in a Diploid Strain of Aspergillus flavus Is Suppressed by Ectopic aflR Expression
Source: Oxford University Press journal article supplement (doi:10.1534/genetics.107.073460), 2007-06-14
Supplement: genetics.107.073460-1.doc [file genetics.107.073460-1.doc]

| **SUPPLEMENTAL TABLE S1** | |
| --- | --- |
|  | |
| **Primer sequences to map the deletion.** | |
|  |  |
| **Primer Name** | **Primer Sequence** |
| 5'649-1 | CTTCGGTAAATTTCTCCTCA |
| 3'649-1 | ACACTTACAGAGTCCGGATG |
| 5'649-2 | TTACAACAAACGCAAAACAG |
| 3'649-2 | CTGGAGGGAAGACCTCTTAT |
| 5'649-3 | TTTGTTTCAGTATGCCCTCT |
| 3'649-3 | ACGGTGAATCTAACACCAAC |
| 5'649-4 | TTCGGTAGTGGATATTGGAG |
| 3'649-4 | GACCCAGCAGGATATCATAA |
| 5'649-5 | CATTCCTTGGAGACAACATC |
| 3'649-5 | GTGTCTGATTAAGGGCTCTG |
| 5'649-6 | CGGCTGATATTCTCACTCTC |
| 3'649-6 | CGTATTATCCAGCTCAGACC |
| 5'649-7 | GACGAATTGTCTTCTCTTGC |
| 3'649-7 | TCTTTGAATGGTCCTGACTC |
| 5'649-8 | AAGCTTCTTCAAGTCTGCTG |
| 3'649-8 | ACGTATTCCAAGCACTTGTC |
| 5'649-8A | AATGATTCTCCAGGACACAG |
| 3'649-8A | AAGTCAATGCTACTGCCAAT |
| 5'649-8A1 | GACACGAGAGACAAAGGAAG |
| 3'649-8A1 | CAACTGGCCTGCTATATTTC |
| 5'649-8A2 | GGAGTAATTCCAATGACCAA |
| 3'649-8A2 | AAAGAAGTTGTCATGGATGG |
| 5'649-8A3 | GGATTCATTGATAAGCGAAG |
| 3'649-8A3 | ACAAGTTCATCTTGGGATTG |
| 5'649-8A4 | CACCCAGGATAGGTATTTCA |
| 3'649-8A4 | GTGAGGACTACCTGATGGAA |
| 5'649-8B | CAATATCCTGGTTGACGATT |
| 3'649-8B | TAACACGGGAAGCATAGTCT |
| 5'649-8C | GGTACTCTTTGCTTCTGGTG |
| 3'649-8C | CCAAACCTCCTCTTATCCTT |
| 5'649-8D | CTCTCAAATTCTCCACGAAG |
| 5'649-9 | CGAGGATCTTGCGTAATAAG |
| 3'649-9 | TCGCTCGAAGTATATCCAAT |
| 5'649-10 | TAGGACTGCCTCCGTATTTA |
| 3'649-10 | TTTCCAGCTAGACAGAAAGC |

| **SUPPLEMENTAL TABLE S2** | |
| --- | --- |
|  |  |
| **Duplicated genes with predicted function in strain 649** | |
|  |  |
| **Protein ID** | **TIGR Gene Prediction** |
| 1918.m01093 | Zinc finger, C2H2 type family protein |
| 1918.m01094 | ubiquinone biosynthesis O-methyltransferase family protein |
| 1918.m01095 | Zn-finger in ubiquitin-hydrolases and other protein |
| 1918.m01096 | ubiquitin (UbiA), putative |
| 1918.m01097 | hypothetical protein |
| 1918.m01098 | Transferase family protein |
| 1918.m01099 | F-box domain containing protein |
| 1918.m01100 | C6 finger domain protein, putative |
| 1918.m01101 | hypothetical protein |
| 1918.m01102 | hypothetical protein |
| 1918.m01103 | hypothetical protein |
| 1918.m01104 | histidine containing phosphotransmitter protein, putative |
| 1918.m01105 | Protein tyrosine phosphatase-like protein, PTPLA containing protein |
| 1918.m01106 | hypothetical protein |
| 1918.m01107 | U6 snRNA-associated Sm-like protein LSM4, putative |
| 1918.m01108 | RfeB, putative |
| 1918.m01109 | phospholipid-translocating P-type ATPase, flippase family protein |
| 1918.m01110 | conserved hypothetical protein |
| 1918.m01111 | Oxidoreductase family, NAD-binding Rossmann fold containing protein |
| 1918.m01112 | To signal recognition particle 72 KDA protein |
| 1918.m01113 | hypothetical protein |
| 1918.m01114 | conserved hypothetical protein |
| 1918.m01115 | C6 transcription factor (AmyR), putative |
| 1918.m01116 | alpha-glucosidase, putative |
| 1918.m01117 | alpha-amylase, putative |
| 1918.m01118 | hypothetical protein |
| 1918.m01119 | hypothetical protein |
| 1918.m01121 | Homeobox domain containing protein |
| 1918.m01123 | hypothetical protein |
| 1918.m01124 | Glycosyl hydrolase family 47 protein |
| 1918.m01125 | hypothetical protein |
| 1918.m01126 | EF-hand protein, putative |
| 1918.m01127 | SNARE domain containing protein |
| 1918.m01128 | Clathrin light chain family protein |
| 1918.m01129 | Cdc37 family protein |
| 1918.m01130 | ABC multidrug transporter Mdr2, putative |
| 1918.m01131 | Nucleoside transporter family protein |
| 1918.m01132 | hypothetical protein |
| 1918.m01133 | conserved hypothetical protein |
| 1918.m01134 | ABC transporter family protein |
| 1918.m01135 | mitochondrion organization and biogenesis-related protein-related |
| 1918.m01136 | hypothetical protein |
| 1918.m01137 | Polysaccharide deacetylase family protein |
| 1918.m01138 | hypothetical protein |
| 1918.m01139 | conserved hypothetical protein |
| 1918.m01140 | hypothetical protein |
| 1918.m01141 | Fungal specific transcription factor domain containing protein |
| 1918.m01142 | kynureninase, putative |
| 1918.m01143 | Indoleamine 2,3-dioxygenase family protein |
| 1918.m01144 | YEATS family protein |
| 1918.m01145 | conserved hypothetical protein |
| 1918.m01146 | conserved hypothetical protein |
| 1918.m01147 | hypothetical protein |
| 1918.m01148 | hypothetical protein |
| 1918.m01149 | hypothetical protein |
| 1918.m01150 | hypothetical protein |
| 1918.m01151 | Ribosomal protein L7/L12 C-terminal domain containing protein |
| 1918.m01152 | t-complex protein 1, delta subunit, putative |
| 1918.m01153 | Peptidase family M48 containing protein |
| 1918.m01154 | C6 sexual development transcription factor Pro1 |
| 1918.m01155 | Major Facilitator Superfamily protein |
| 1918.m01156 | hypothetical protein |
| 1918.m01157 | hypothetical protein |
| 1918.m01159 | rhamnogalacturonan acetylesterase, putative |
| 1918.m01160 | hypothetical protein |
| 1918.m01161 | hypothetical protein |
| 1918.m01162 | hypothetical protein |
| 1918.m01163 | secretory component protein shr3, putative |
| 1918.m01164 | hypothetical protein |
| 1918.m01165 | palFp, putative |
| 1918.m01166 | GAJ protein, putative |
| 1918.m01167 | Sugar transporter family protein |
| 1918.m01168 | hypothetical protein |
| 1918.m01169 | hypothetical protein |
| 1918.m01170 | hypothetical protein |
| 1918.m01171 | hypothetical protein |
| 1918.m01172 | hypothetical protein |
| 1918.m01173 | hypothetical protein |
| 1918.m01174 | hypothetical protein |
| 1918.m01175 | metallo-beta-lactamase superfamily protein |
| 1918.m01176 | hypothetical protein |
| 1918.m01177 | hypothetical protein |
| 1918.m01178 | oxidoreductase, short chain dehydrogenase/reductase family protein |
| 1918.m01179 | alpha-L-rhamnosidase A precursor, putative |
| 1918.m01180 | hypothetical protein |
| 1918.m01181 | hypothetical protein |
| 1918.m01182 | hypothetical protein |
| 1918.m01183 | Pectate lyase family protein |
| 1918.m01184 | ZIP zinc/iron transport family protein |
| 1918.m01185 | hypothetical protein |
| 1918.m01186 | Epoxide hydrolase N terminus family protein |
| 1918.m01187 | hypothetical protein |
| 1918.m01188 | Flavin-binding monooxygenase-like family protein |
| 1918.m01189 | hypothetical protein |
| 1918.m01190 | hypothetical protein |
| 1918.m01191 | hypothetical protein |
| 1918.m01192 | Melibiase family protein |
| 1918.m01193 | conserved hypothetical protein |
| 1918.m01194 | hypothetical protein |
| 1918.m01195 | hypothetical protein |
| 1918.m01196 | hypothetical protein |
| 1918.m01197 | hypothetical protein |
| 1918.m01198 | UPF0047 domain protein, putative |
| 1918.m01199 | NADH-ubiquinone oxidoreductase, putative |
| 1918.m01200 | hypothetical protein |
| 1918.m01201 | Lipase family protein |
| 1918.m01202 | MGC84447 protein, putative |
| 1918.m01203 | a-pheromone processing metallopeptidase Ste23 |
| 1918.m01204 | co-factor independent proline racemase, putative |
| 1918.m01205 | hypothetical protein |
| 1918.m01206 | dephospho-CoA kinase family protein |
| 1918.m01207 | To blastomyces yeast phase-specific protein 1 |
| 1918.m01208 | Histone deacetylase family protein |
| 1918.m01209 | Histone deacetylase, putative |
| 1918.m01210 | glyceraldehyde 3-phosphate dehydrogenase (Ccg-7), putative |
| 1918.m01211 | hypothetical protein |
| 1918.m01212 | hypothetical protein |
| 1918.m01213 | R3H domain containing protein |
| 1918.m01214 | GPI anchored protein, putative |
| 1918.m01215 | oxidoreductase, aldo/keto reductase family protein |
| 1918.m01216 | HSF-type DNA-binding domain containing protein |
| 1918.m01217 | peptidyl-prolyl cis-trans isomerase, cyclophilin-type family protein |
| 1918.m01218 | hypothetical protein |
| 1918.m01219 | Flavoprotein |
| 1918.m01220 | hypothetical protein |
| 1918.m01221 | Histidine acid phosphatase family protein |
| 1918.m01222 | hypothetical protein |
| 1918.m01223 | p21-Arc, putative |
| 1918.m01224 | Eukaryotic initiation factor 3, gamma subunit family protein |
| 1918.m01225 | hypothetical protein |
| 1918.m01226 | DUF221 domain protein, putative |
| 1918.m01227 | conserved hypothetical protein |
| 1918.m01228 | DNA repair protein |
| 1918.m01229 | Pro11 protein, putative |
| 1918.m01230 | hypothetical protein |
| 1918.m01231 | nucleolar RNA methyltransferase (Nop2), putative |
| 1918.m01232 | Ubiquitin carboxyl-terminal hydrolase family protein |
| 1918.m01233 | deoxyhypusine synthase, putative |
| 1918.m01234 | Myb-like DNA-binding domain containing protein |
| 1918.m01235 | hypothetical protein |
| 1918.m01236 | multidrug transporter, ,putative |
| 1918.m01237 | acetyltransferase, GNAT family protein |
| 1918.m01238 | hypothetical protein |
| 1918.m01239 | hypothetical protein |
| 1918.m01240 | Glycosyl hydrolases family 18 protein |
| 1918.m01241 | LysM domain containing protein |
| 1918.m01242 | phenylacetate 2-hydroxylase, putative |
| 1918.m01243 | Fungal specific transcription factor domain containing protein |
| 1918.m01244 | conserved hypothetical protein |
| 1918.m01245 | Major Facilitator Superfamily protein |
| 1918.m01246 | hypothetical protein |
| 1918.m01247 | oxidoreductase, short chain dehydrogenase/reductase family protein |
| 1918.m01248 | IMP dehydrogenase / GMP reductase domain containing protein |
| 1918.m01249 | hypothetical protein |
| 1918.m01250 | hypothetical protein |
| 1918.m01251 | hypothetical protein |
| 1918.m01252 | oxidoreductase, short chain dehydrogenase/reductase family protein |
| 1918.m01253 | hypothetical protein |
| 1918.m01254 | hypothetical protein |
| 1918.m01255 | hypothetical protein |
| 1918.m01256 | oxidoreductase, zinc-binding dehydrogenase family protein |
| 1918.m01257 | oxidoreductase, short chain dehydrogenase/reductase family protein |
| 1918.m01258 | ZIP Zinc transporter family protein |
| 1918.m01259 | hypothetical protein |
| 1918.m01260 | hypothetical protein |
| 1918.m01261 | Major Facilitator Superfamily protein |
| 1918.m01262 | hypothetical protein |
| 1918.m01263 | ATPase, histidine kinase-, DNA gyrase B-, and HSP90-like domain containing protein |
| 1918.m01264 | ABC-2 type transporter family protein |
| 1918.m01265 | Tna1, putative |
| 1918.m01266 | Sugar transporter family protein |
| 1918.m01267 | hypothetical protein |
| 1918.m01268 | IMP-specific 5'-nucleotidase family protein |
| 1918.m01269 | 6-phosphofructokinase alpha subunit, putative |
| 1918.m01270 | hypothetical protein |
| 1918.m01271 | FAD dependent oxidoreductase family protein |
| 1918.m01272 | DUF453 domain protein, putative |
| 1918.m01273 | hypothetical protein |
| 1918.m01274 | hypothetical protein |
| 1918.m01275 | L-aminoadipate-semialdehyde dehydrogenase-related |
| 1918.m01276 | conserved hypothetical protein |
| 1918.m01277 | Amidase family protein |
| 1918.m01278 | Major Facilitator Superfamily protein |
| 1918.m01279 | CorA-like Mg2+ transporter protein |
| 1918.m01280 | hypothetical protein |
| 1918.m01281 | hypothetical protein |
| 1918.m01282 | phosphate-repressible phosphate permease, putative |
| 1918.m01283 | hypothetical protein |
| 1918.m01285 | Amidase family protein |
| 1918.m01286 | oxidoreductase, zinc-binding dehydrogenase family protein |
| 1918.m01287 | Glycosyl hydrolase family 76 protein |
| 1918.m01288 | GMC oxidoreductase family protein |
| 1918.m01289 | Glycosyl hydrolases family 2, sugar binding domain containing protein |
| 1918.m01290 | Amidase family protein |
| 1918.m01291 | hypothetical protein |
| 1918.m01292 | hypothetical protein |
| 1918.m01293 | Cytochrome P450 family protein |
| 1918.m01294 | Major Facilitator Superfamily protein |
| 1918.m01295 | protease-related |
| 1918.m01296 | conserved hypothetical protein |
| 1918.m01297 | GMC oxidoreductase family protein |
| 1918.m01298 | Negative transcriptional regulator family protein |
| 1918.m01299 | SSS sodium solute transporter superfamily protein |
| 1918.m01300 | xenobiotic compound monooxygenase, DszA family, putative |
| 1918.m01301 | hypothetical protein |
| 1918.m01302 | conserved hypothetical protein |
| 1918.m01303 | conserved hypothetical protein |
| 1918.m01304 | conserved hypothetical protein |
| 1918.m01305 | Major Facilitator Superfamily protein |
| 1918.m01306 | Cytochrome P450 family protein |
| 1918.m01307 | Cytochrome P450 family protein |
| 1918.m01308 | sterol carrier protein, putative |
| 1918.m01309 | Secretory lipase family protein |
| 1918.m01310 | Fungal specific transcription factor domain containing protein |
| 1918.m01311 | haloacid dehalogenase-like hydrolase family protein |
| 1918.m01312 | Amino acid permease family protein |
| 1918.m01313 | hypothetical protein |
| 1918.m01314 | FAD dependent oxidoreductase family protein |
| 1918.m01316 | Major Facilitator Superfamily protein |
| 1918.m01317 | Fungal specific transcription factor domain containing protein |
| 1918.m01318 | dihydrodipicolinate synthase DapA, ,putative |
| 1918.m01319 | hypothetical protein |
| 1918.m01320 | hypothetical protein |
| 1918.m01321 | hypothetical protein |
| 1918.m01322 | hypothetical protein |
| 1918.m01323 | hypothetical protein |
| 1918.m01324 | hypothetical protein |
| 1918.m01325 | conserved hypothetical protein |
| 1918.m01326 | hypothetical protein |
| 1918.m01327 | hypothetical protein |
| 1918.m01328 | hypothetical protein |
| 1918.m01329 | SirS-related |
| 1918.m01330 | hypothetical protein |
| 1918.m01331 | hypothetical protein |
| 1918.m01332 | hypothetical protein |
| 1918.m01333 | LysM domain containing protein |
| 1918.m01334 | hypothetical protein |
| 1918.m01335 | oxidoreductase, zinc-binding dehydrogenase family protein |
| 1918.m01336 | hydrolase CocE/NonD family protein |
| 1918.m01337 | conserved hypothetical protein |
| 1918.m01338 | hypothetical protein |
| 1918.m01339 | Glutathione S-transferase, N-terminal domain containing protein |
| 1918.m01340 | D-isomer specific 2-hydroxyacid dehydrogenase, NAD binding domain containing protein |
| 1918.m01342 | Oxidoreductase molybdopterin binding domain containing protein |
| 1918.m01343 | Oxidoreductase NAD-binding domain containing protein |
| 1918.m01344 | isochorismatase family protein |
| 1918.m01345 | hypothetical protein |
| 1918.m01346 | FAD binding domain containing protein |
| 1918.m01347 | hypothetical protein |
| 1918.m01348 | Dienelactone hydrolase family protein |
| 1918.m01349 | Fungal specific transcription factor domain containing protein |
| 1918.m01351 | small oligopeptide transporter, OPT family protein |
| 1918.m01352 | hypothetical protein |
| 1918.m01353 | Cell wall protein, putative |
| 1918.m01354 | F-box domain containing protein |
| 1918.m01355 | hypothetical protein |
| 1918.m01356 | Probable molybdopterin binding domain containing protein |
| 1918.m01357 | nitrate reductase, putative |
| 1918.m01358 | Major Facilitator Superfamily protein |
| 1918.m01359 | ABC transporter family protein |
| 1918.m01360 | ToxD-like zinc binding oxidoreductase, putative |
| 1918.m01361 | adenosine deaminase family protein |
| 1918.m01362 | NAD dependent epimerase/dehydratase family protein |
| 1918.m01363 | extracellular conserved serine-rich protein, putative |
| 1918.m01364 | Alpha amylase, catalytic domain containing protein |
| 1918.m01365 | Alpha amylase, catalytic domain containing protein |
| 1918.m01366 | Alpha amylase, catalytic domain containing protein |
| 1918.m01367 | Acyltransferase family protein |
| 1918.m01368 | hypothetical protein |
| 1918.m01369 | Fungal specific transcription factor domain containing protein |
| 1918.m01370 | conserved hypothetical protein |
| 1918.m01371 | Major Facilitator Superfamily protein |
| 1918.m01372 | Cutinase family protein |
| 1918.m01373 | hexokinase-like protein, putative |
| 1918.m01374 | conserved hypothetical protein |
| 1918.m01375 | hypothetical protein |
| 1918.m01376 | beta-glucosidase, putative |
| 1918.m01377 | Pectinesterase family protein |
| 1918.m01378 | hypothetical protein |
| 1918.m01379 | FKBP-type peptidyl-prolyl isomerase, putative |
| 1918.m01380 | hypothetical protein |
| 1918.m01381 | hypothetical protein |
| 1918.m01382 | hypothetical protein |
| 1918.m01383 | Cytochrome b5-like Heme/Steroid binding domain containing protein |
| 1918.m01384 | Major Facilitator Superfamily protein |
| 1918.m01385 | hypothetical protein |
| 1918.m01386 | hypothetical protein |
| 1918.m01388 | Amidase family protein |
| 1918.m01389 | hypothetical protein |
| 1918.m01390 | FAD dependent oxidoreductase family protein |
| 1918.m01391 | Carboxylesterase family protein |
| 1918.m01392 | hypothetical protein |
| 1918.m01393 | acetyltransferase, GNAT family protein |
| 1918.m01394 | Major Facilitator Superfamily protein |
| 1918.m01395 | hypothetical protein |
| 1918.m01396 | hypothetical protein |
| 1918.m01397 | hypothetical protein |
| 1918.m01398 | hypothetical protein |
| 1918.m01399 | hypothetical protein |
| 1918.m01400 | hypothetical protein |
| 1918.m01401 | hypothetical protein |
| 1918.m01402 | hypothetical protein |
| 1918.m01403 | TmpA, putative |
| 1918.m01404 | hypothetical protein |
| 1918.m01405 | Major Facilitator Superfamily protein |
| 1918.m01406 | Fungal specific transcription factor domain containing protein |
| 1918.m01407 | Cytochrome P450 family protein |
| 1918.m01408 | NAD dependent epimerase/dehydratase family protein |
| 1918.m01409 | hypothetical protein |
| 1918.m01410 | hypothetical protein |
| 1918.m01411 | hypothetical protein |
| 1918.m01412 | POT family protein |
| 1918.m01413 | hypothetical protein |
| 1918.m01414 | hypothetical protein |
| 1918.m01415 | Amidohydrolase family protein |
| 1918.m01416 | Major Facilitator Superfamily protein |
| 1918.m01417 | hypothetical protein |
| 1918.m01418 | hypothetical protein |
| 1918.m01419 | Sugar transporter family protein |
| 1918.m01420 | RTA1 domain protein, putative |
